# Supplementary material
Source: PubMed Central journal article supplement (PMC2930745)
Supplement: supp_M109.095182_jbc.M109.095182-1.pdf [file supp_M109.095182_jbc.M109.095182-1.pdf]

## Supplemental data

### STRUCTURAL INSIGHTS INTO THE CATALYTIC MECHANISM OF BACTERIAL GUANOSINE-DIPHOSPHO-D-MANNOSE PYROPHOSPHORYLASE AND ITS REGULATION BY DIVALENT IONS

Marie-Cécile Pelissier, Scott A. Lesley, Peter Kuhn and Yves Bourne

**Supplementary Table I** : Residues involved in polar contacts with bound substrates/product

|                                    |                                   | TmGMP-Man1P                         | TmGMP-GTP                                     | TmGMP-GDPMan                        |
|------------------------------------|-----------------------------------|-------------------------------------|-----------------------------------------------|-------------------------------------|
| <i>Mannose moiety</i>              | C <sub>2</sub> -OH                | Asn189 SC<br>Asp239 SC              |                                               | Asp239 SC                           |
|                                    | C <sub>3</sub> -OH                | Glu170 SC<br>Asn189 SC<br>Asp239 SC |                                               | Gly150 MC<br>Glu170 SC<br>Asn189 SC |
|                                    | C <sub>4</sub> -OH                | Gly150 MC<br>Asn189 MC              |                                               | Gly150 MC<br>Asn189 MC              |
|                                    | C <sub>6</sub> -OH                | -                                   |                                               | His110 SC                           |
| <i>Guanosine moiety</i>            | N <sub>1</sub> H                  |                                     | Glu80 SC                                      | -                                   |
|                                    | C <sub>2</sub> -NH <sub>2</sub>   |                                     | Val56 MC<br>Glu80 SC                          | Val56 MC<br>Glu80 SC                |
|                                    | N <sub>3</sub>                    |                                     | Gly9 MC                                       | -                                   |
|                                    | C <sub>6</sub> =O                 |                                     | Asn85 MC                                      | Asn85 MC                            |
|                                    | C <sub>2</sub> '-OH               |                                     | Gly10 MC                                      | Gly9 MC                             |
|                                    | C <sub>3</sub> '-OH               |                                     | Leu7 MC<br>Ala108 MC                          | Leu7 MC<br>Ala108 MC                |
| <i>Phosphate moieties</i>          | P <sub>α</sub>                    |                                     | Arg14 SC<br>Lys25 SC                          | -                                   |
|                                    | P <sub>β</sub> / P <sub>Man</sub> | Lys171 SC                           | Gly12 MC                                      | Lys171 SC                           |
|                                    | P <sub>γ</sub>                    |                                     | Glu13 MC<br>Arg14 MC<br>Arg14 SC<br>Arg326 SC |                                     |
| MC : Main chain<br>SC : Side chain |                                   |                                     |                                               |                                     |

**Supplementary Figure 1:** Alignment of GMP sequences from different bacterial sources.

Sequence alignment of TmGMP with orthologs from *T. thermophilus* (TtGMP) *C. perfringens* (CpGMP), and *L. interrogans* (LiGMP) belonging to the monofunctional GMP class and *H. pylori* (HPGMP-PMI), *P. aeruginosa* (PaGMP-PMI), *E. coli* (EcPMI-GMP) and *P. furiosus* (PfGMP-PMI) belonging to the bifunctional GMP-PMI class. Asterisks and filled circles indicate residues that interact with the nucleotide and sugar moieties, respectively. Triangles denote residues buried at the dimeric interface.
